# Supplementary material for: Chondrogenic Differentiation from Induced Pluripotent Stem Cells Using Non-Viral Minicircle Vectors
Source: MDPI journal article supplement (doi:10.3390/cells9030582), 2020-03-01
Supplement: s1 [file s1]

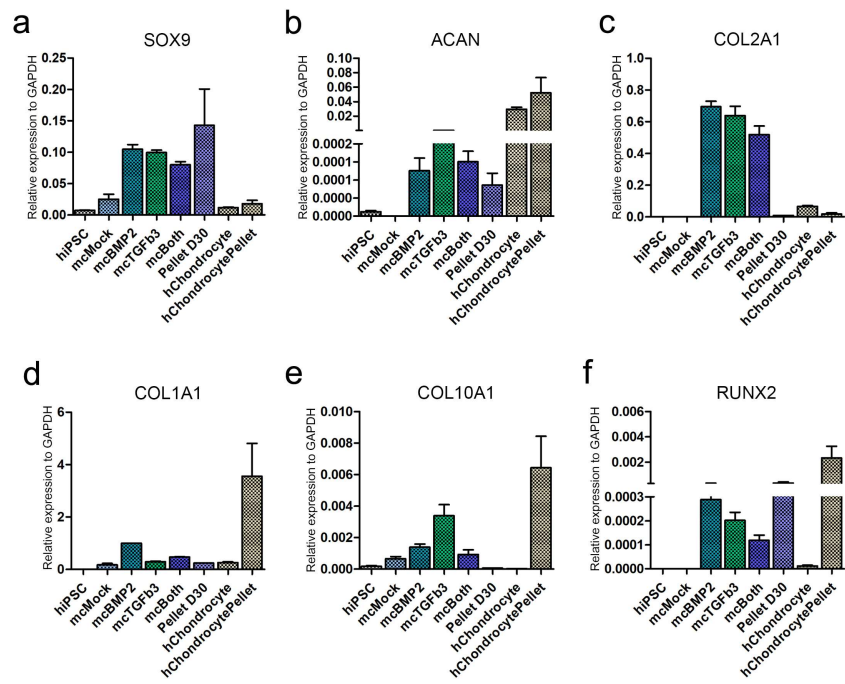

**Figure S1.** Relative expression of chondrogenic markers compared to human articular chondrocytes.
